# Supplementary material for: A method for permanent genetic transformation using embryonic callus of Pinus koraiensis
Source: Research Square preprint supplement (doi:10.21203/rs.3.rs-4173927/v1), 2024-04-12
Supplement: Supplementary file 1 [file 8a7fd274be21a207d8c05328.docx]

**Supplementary File 1. Composition of DCR basic medium**

| Reagent component | | Content /（mg·L-1） |
| --- | --- | --- |
| Inorganic ion | NH4NO3 | 400.00 |
|  | KNO3 | 340.00 |
|  | KH2PO4 | 170.00 |
|  | MgSO4·7H2O | 370.00 |
|  | ZnSO4·7H2O | 4.30 |
|  | H3BO3 | 3.10 |
|  | CuSO4·5H2O | 0.125 |
|  | MnSO4·2H2O | 8.45 |
|  | CoCl2·6H2O | 0.125 |
|  | KI | 4.150 |
|  | Na2Mo4·2H2O | 0.125 |
|  | NiCl | 0.0125 |
|  | FeSO4·7H2O | 13.90 |
|  | Na2EDTA | 18.65 |
|  | CaCl2·4H2O | 42.50 |
|  | Ca(NO3)2·4H2O | 278.00 |
| Organic matter | Glycine | 1.00 |
|  | Vitamin B1 | 0.50 |
|  | Vitamin B5 | 0.25 |
|  | Vitamin B6 | 0.25 |

**Supplementary File 2. Composition of mLV basic medium**

| Reagent component | | Content /（mg·L-1） |
| --- | --- | --- |
| Inorganic ion | NH4NO3 | 825.00 |
|  | KNO3 | 950.00 |
|  | KH2PO4 | 170.00 |
|  | MgSO4·7H2O | 925.00 |
|  | ZnSO4·7H2O | 0.025 |
|  | H3BO3 | 2.23 |
|  | CuSO4·5H2O | 0.0025 |
|  | MnSO4·2H2O | 0.86 |
|  | CoCl2·6H2O | 0.0025 |
|  | KI | 6.20 |
|  | Na2Mo4·2H2O | 0.083 |
|  | FeSO4·7H2O | 13.90 |
|  | Na2EDTA | 18.65 |
|  | CaCl2·4H2O | 5.50 |
| Organic matter | Vitamin B6 | 0.01 |
|  | Vitamin B1 | 0.01 |
|  | Vitamin B5 | 0.05 |
